# Supplementary material for: Science practices in the general chemistry laboratory: hits, misses, and near misses
Source: Royal Society of Chemistry journal article supplement (doi:10.1039/d5rp00272a), 2025-11-19
Supplement: d5rp00272a1.xlsx [file d5rp00272a1.xlsx]

## Sheet: Sheet1
	NEAR MISSES
	CHEM 161 Lab 1
		AI	Prelab
		CE	Postlab	Q5			Totals
		MCT	Postlab	Q6	12 AI		AI = 25
	Lab 2				18 CE		CE = 19
		AI	Prelab	Q1	11 MCT		EE = 19
		CE	Prelab	Q2	12 DUM		DUM = 15
		CE	inlab	worksheet	18 EE		MCT = 27
		MCT	postlab	Q2-4
	Lab 3	AI	Inlab	Rxn 4
		AI	Inlab	Rxn 6
		MCT	Inlab	Rxn 7
		AI	Inlab	Rxn 8
		DUM	Inlab	Rxn 9
		CE	Inlab	Rxn 10
		EAE	Inlab	Rxn 11
		MCT	Postlab	Q1-5
		AI	Postlab	Q1-5
		CE	Postlab	Q1-5
		AI	Postlab	Q1-5
	Lab 4
		AI	Inlab	Inv 4
		DUM	Inlab	Part 3
		DUM	Postlab
		CE	Postlab
	Lab 5	nothing	here
	Virtual Lab 1	MCT	inlab	Q5
		CE	inlab	Q11
		CE	inlab	Q12
		CE	inlab	Q13
		CE	inlab	Q14
		CE	inlab	Q18
		CE	inlab	Q19
		AI	inlab	Q20
		CE	inlab	Q21-23
		CE	inlab	Q25
		CE	inlab	Q26
		AI	inlab	Q27
		CE	inlab	Q28
		CE	inlab	Q29
		CE	inlab	Q40-41
	Virtual Lab 2	MCT	inlab	Q1-2
		MCT	inlab	Q3-9
	Virtual Lab 3	DUM	inlab	Q1-3
		MCT	inlab	Q1-3
		MCT	inlab	Q6-7
		DUM	inlab	Q6-7
		DUM	inlab	Q8-9
		AI	inlab	Q14
		DUM	inlab	Q15-16
		DUM	inlab	Q23
		AI	inlab	Q27-28
		DUM	inlab	Q40
		DUM	inlab	Q41-43
		DUM	inlab	Q57
	Virtual Lab 4	DUM	inlab	Q2
		MCT	inlab	Q26
		MCT	inlab	Q27
	CHEM 162
	Lab 1	AI	Prelab		7 AI
	Lab 4	AI	Postlab	Q4	7 MCT
		CE	Postlab	Q4	1 CE
		EAE	Postlab	Q4	1 EAE
	Lab 5	AI	Prelab	Q1
		MCT	Prelab	Q2
		MCT	Prelab	Q3
		MCT	Prelab	Q4
	Lab 6	MCT	Prelab
		MCT	Postlab	Q2
		MCT	Postlab	Q4
		AI	Postlab	Q4
	Lab 7	AI	In lab	Part A
		AI	Inlab	Part B
	Lab 8	AI	Postlab	Q6,8
		MCT	Postlab	Q6,8
	CHEM 163					6 AI	*also fewer opp for students to engage in practices
	Lab 1	AI	Lab	Measurement		3 DUM
		AI	Lab	Buret		9 MCT
		MCT	Lab	Measurement
		MCT	Lab	Buret
		AI	Lab	volumetric
		MCT	Lab	volumetric
	Lab 2	MCT	Lab
	Lab 3	AI	Lab	Summary 1
		MCT	Lab	Summary 1
		AI	Lab	Summary 2
		MCT	Lab	Summary 2
	Lab 4	MCT	Prelab
		MCT	In lab	Summary sheet 1
	Lab 5	DUM	Inlab
		MCT	Inlab
	Lab 7	DUM	Lab	Intro
		DUM	Lab	Part 1
		AI	Lab
