# Supplementary material for: Science practices in the general chemistry laboratory: hits, misses, and near misses
Source: Royal Society of Chemistry journal article supplement (doi:10.1039/d5rp00272a), 2025-11-19
Supplement: d5rp00272a2.xlsx [file d5rp00272a2.xlsx]

## Sheet: Sheet1
	CHEM
	CHEM I	Practices	Number of times shows up
	Lab 1
	Lab	Analyzing & Interpretation (P4)	1
		Math & Computational Thinking (P5)	3
	Lab 2	None
	Lab 3
	Lab	Developing & Using Models (P2)	1
		Constructing Explanations (P6)	1
		Engaging in Argument from Evidence (P7)	1
	Lab 4
	Lab	Analyzing & Interpretation (P4)	5
		Math & Computational Thinking (P5)	4
	Lab 5
	Prelab	None
	Lab	None
	Postlab	Analyzing & Interpretation (P4)	2
		Math & Computational Thinking (P5)	2
	Lab 6	None
	Lab 7
	Prelab	None
	Lab	Analyzing & Interpretation (P4)	1
		Math & Computational Thinking (P5)	1
	Postlab	None
	Lab 8
	Prelab	None
	Lab	Developing & Using Models (P2)	3
	Postlab	None
	Lab 9
	Prelab	None
	Lab	Analyzing & Interpretation (P4)	2
	Postlab	Analyzing & Interpretation (P4)	1
	CHEM II	Practices	Number of times shows up
	Lab 1
	Prelab	Math & Computational Thinking (P5)	1	in lab = 12
	Lab	None		out of lab =21
	Postlab	Math & Computational Thinking (P5)	1	total = 33
		Constructing Explanations (P6)	1
		Engaging in Argument from Evidence (P7)	1
	Lab 2
	Prelab	None
	Lab	Analyzing & Interpretation (P4)	1
	Lab 3
	Prelab	None
	Lab	Analyzing & Interpretation (P4)	1
		Math & Computational Thinking (P5)	1
	Lab 4
	Lab	Developing & Using Models (P2)	1
		Analyzing & Interpretation (P4)	3
		Math & Computational Thinking (P5)	1
		Constructing Explanations (P6)	1
		Engaging in Argument from Evidence (P7)	1
	Postlab	Analyzing & Interpretation (P4)	1
		Constructing Explanations (P6)	1
		Engaging in Argument from Evidence (P7)	1
	Lab 5
	Prelab	None
	Lab	None
	Postlab	Math & Computational Thinking (P5)	1
		Constructing Explanations (P6)	1
		Engaging in Argument from Evidence (P7)	1
	Lab 6
	Prelab	None
	Lab	Analyzing & Interpretation (P4)	1
		Math & Computational Thinking (P5)	1
	Postlab	Analyzing & Interpretation (P4)	1
		Math & Computational Thinking (P5)	3
	Lab 7	None
	Lab 8
	Postlab	Developing & Using Models (P2)	1
		Analyzing & Interpretation (P4)	3
		Math & Computational Thinking (P5)	3
	CHEM III	Practices	Number of times shows up
	Lab 1	None
	Lab 2	None
	Lab 3	None
	Lab 4
	Prelab	Analyzing & Interpretation (P4)	1
		Math & Computational Thinking (P5)	1
	Lab	Analyzing & Interpretation (P4)	1
		Math & Computational Thinking (P5)	1
	Lab 5
	Postlab	Analyzing & Interpretation (P4)	1
		Math & Computational Thinking (P5)	1
	Lab 6
	Postlab	Analyzing & Interpretation (P4)	1
		Math & Computational Thinking (P5)	1
	Lab 7
	Prelab	None
	Lab	Analyzing & Interpretation (P4)	2
		Math & Computational Thinking (P5)	1
